# Supplementary material
Source: HighWire-hosted journal article supplement (https://ajnr-sso.highwirestaging.com/highwire/filestream/99505/field_highwire_adjunct_files/0/0553.pdf)
Supplement: 0553.pdf [file 0553.pdf]

**PL faculty survey items and responses<sup>a</sup>**

| Item No. | Item                                                                                                                                                                                                                                                                                                                                                                                                                                                                                                                                                    | Answer Choices | Responses (n = 5)   |
|----------|---------------------------------------------------------------------------------------------------------------------------------------------------------------------------------------------------------------------------------------------------------------------------------------------------------------------------------------------------------------------------------------------------------------------------------------------------------------------------------------------------------------------------------------------------------|----------------|---------------------|
| 1        | Have you previously participated in score-based random review (RADPEER or similar)?                                                                                                                                                                                                                                                                                                                                                                                                                                                                     | Yes or no      | 5 yes               |
| 2        | Comparing your score-based random review experience to the peer learning experience, please list any differences favoring score-based random review:<br>Open-text responses:<br>1) Faster<br>2) Simple, provides an easy number metric to follow (prior experiences I have had with score-based reviewing were not truly randomized)<br>3) Mix of agree and disagree cases, gives a sense of relative accuracy (because only the missed diagnoses are discussed on peer learning)<br>4) More objectivity                                                | Open text      | 4 Responses         |
| 3        | Comparing your score-based random review experience to the peer learning experience, please list any differences favoring peer learning:<br>Open text responses:<br>1) More fun, learning something, discovering improvement opportunities<br>2) Allows group discussion, brings up educational points or quality improvement opportunities (such as protocol tweaks)<br>3) More interactive and constructive feedback ensures input from colleagues, as to steps to minimize errors<br>4) Better experience overall, better for learning and improving | Open text      | 4 Responses         |
| 4        | Have you previously participated in peer learning (nonrandom, learning jointly from mistakes)?                                                                                                                                                                                                                                                                                                                                                                                                                                                          | Yes or no      | 2 Yes, 3 no         |
| 5        | How would you rate the ease of meeting the 100% peer learning attendance requirement?                                                                                                                                                                                                                                                                                                                                                                                                                                                                   | 1–5 Stars      | Average rating, 4.8 |
| 6        | How would you rate the learning value for peer learning, on average?                                                                                                                                                                                                                                                                                                                                                                                                                                                                                    | 1–5 Stars      | Average rating, 4.8 |
| 7        | Please rate how safe you feel during discussions of mistakes?                                                                                                                                                                                                                                                                                                                                                                                                                                                                                           | 1–5 Stars      | Average rating, 4.6 |
| 8        | How do you rate the value of obtaining CME credits with peer learning?                                                                                                                                                                                                                                                                                                                                                                                                                                                                                  | 1–5 Stars      | Average rating, 4.6 |
| 9        | How would you rate the effectiveness of improvements being made as a result of peer learning discussions?                                                                                                                                                                                                                                                                                                                                                                                                                                               | 1–5 Stars      | Average rating, 4.2 |
| 10       | How would you rate the ease of reporting cases for peer learning?                                                                                                                                                                                                                                                                                                                                                                                                                                                                                       | 1–5 Stars      | Average rating, 4.6 |
| 11       | Please add any comments/suggestions for improving the peer learning meetings:<br>Open text responses:<br>1) Use 80% participation target<br>2) Sometimes improvements are too quick and reactive (can lead to things like sequence bloat with too many extra images to be reviewed); we have multiple methods of reporting cases for review, but at times it may be too many options of different methods<br>3) May include good call cases, even of the reviewer agrees with interpretation                                                            | Open text      | 3 Responses         |

<sup>a</sup> A total of 5 full-time pediatric neuroradiologists responded; the response rate was 100%.

**Table 2: The number of cases submitted per faculty per month in 2021.** Faculty A and D joined the Peer Learning program in August of 2021.

| Faculty | Jan | Feb | Mar | Apr | Ma | Jun | Jul | Aug | Sep | Oct | Nov | Dec |
|---------|-----|-----|-----|-----|----|-----|-----|-----|-----|-----|-----|-----|
| A       |     |     |     |     |    |     |     | 8   | 8   | 21  | 10  | 10  |
| B       | 4   | 16  | 9   | 2   | 9  | 4   | 4   | 8   | 8   | 4   | 15  | 6   |
| C       | 3   | 21  | 7   | 0   | 7  | 5   | 5   | 8   | 8   | 10  | 26  | 8   |
| D       |     |     |     |     |    |     |     | 8   | 8   | 1   | 0   | 3   |
| E       | 3   | 7   | 1   | 2   | 1  | 4   | 4   | 1   | 1   | 16  | 10  | 0   |
